# Supplementary material
Source: Elsevier journal article supplement (https://comptes-rendus.academie-sciences.fr/geoscience/article/10.1016/j.crte.2016.01.001/file/attach/mmc1.pdf)
Supplement: mmc1 [file mmc1.pdf]

## Table legends for Annex 1

### TABLE 1

Apatite fission track results. Nb of grains is the number of crystals analyzed.  $\rho_d$  is the density of induced fission track density (per  $\text{cm}^2$ ) that would be obtained in each individual sample if its U concentration was equal to the U concentration of the CN5 glass dosimeter. Number in brackets is the total number of tracks counted.  $\rho_s$  and  $\rho_i$  represent sample spontaneous and induced track densities per  $\text{cm}^2$ . Number in brackets is the total number of tracks counted. [U] is the calculated uranium density.  $P(\chi^2)$  is the probability in % of  $\chi^2$  for  $\nu$  degrees of freedom (where  $\nu = \text{number of crystals} - 1$ ).  $D_{\text{par}}$  is the mean fission-track pit diameter in  $\mu\text{m}$  corrected following Sobel and Seward (2010) using a correction factor of 0.825. Ages have been calculated using the Trackkey software (Dunkl, 2002). Samples indicated # are from Meresse (2010).

### TABLE 2

Apatite (U–Th)/He results. Nb of grains is the number of crystals analyzed into an aliquot; FT, geometric correction factor for age calculation; corrected age is the age corrected with the FT factor; the uncertainty of  $1\sigma$  was fixed at 8% of the age; mean age, the pondered mean of the aliquot ages in each sample.

### TABLE 3

Zircon (U–Th)/He results. FT, geometric correction factor for age calculation; eU, effective uranium concentration; corrected age, age corrected with the FT factor; the uncertainty of  $1\sigma$  was fixed at 8% of the age; mean age, the pondered mean of the aliquot ages in each sample.

| Sample              | Latitude<br>(North) | Longitude<br>(East) | Altitude<br>[m] | Nb | $\rho_d \times 10^4$<br>cm <sup>-2</sup> | $\rho_s \times 10^4$<br>cm <sup>-2</sup> | $\rho_i \times 10^4$<br>cm <sup>-2</sup> | [U]<br>[ppm] | P( $\chi^2$ )<br>[%] | Dpar<br>[ $\mu$ m] | Mean track<br>length<br>[ $\mu$ m] ( $\pm 1 \sigma$ )<br>(counted) | Central age<br>[Ma]<br>( $\pm 2\sigma$ ) |
|---------------------|---------------------|---------------------|-----------------|----|------------------------------------------|------------------------------------------|------------------------------------------|--------------|----------------------|--------------------|--------------------------------------------------------------------|------------------------------------------|
| <i>Balaitous</i>    |                     |                     |                 |    |                                          |                                          |                                          |              |                      |                    |                                                                    |                                          |
| GPY15               | 42°53ø1.2ö          | 00°16ø1.00ö         | 1417            | 24 | 94.36 (10038)                            | 22.64 (294)                              | 180.2 (2340)                             | 21.96        | 0                    | 1.4                | --                                                                 | 22.23 $\pm$ 2.1                          |
| #BA1                | 42°50ø20.0ö         | 00°17ø25.7ö         | 3137            | 20 | 141.4 (8282)                             | 22.4 (136)                               | 185.2 (1123)                             | 14.9         | 42                   | 2.1                | 13.5 $\pm$ 1.9 (56)                                                | 29.3 $\pm$ 2.7                           |
| #BA5                | 42°51ø29.1ö         | 00°17ø22.2ö         | 2080            | 20 | 134.7 (8282)                             | 18.2 (74)                                | 150.8 (611)                              | 13.87        | 100                  | 1.9                | 13.9 $\pm$ 1.7 (66)                                                | 27.9 $\pm$ 3.5                           |
| #BA8                | 42°45ø15.3ö         | 00°14ø22.0ö         | 1614            | 20 | 138.7 (8282)                             | 24.3 (156)                               | 281.3 (1806)                             | 24.51        | 98                   | 2.1                | 13.8 $\pm$ 1.9 (114)                                               | 20.5 $\pm$ 1.8                           |
| <i>Eaux-Chaudes</i> |                     |                     |                 |    |                                          |                                          |                                          |              |                      |                    |                                                                    |                                          |
| GPY09               | 42°53ø14.5ö         | 00°25ø28.0ö         | 1066            | 15 | 99.04 (10038)                            | 12.46 (37)                               | 182.24 (541)                             | 21.66        | 10                   | 1.1                | --                                                                 | 12.2 $\pm$ 2.2                           |
| GPY11               | 42°54ø34.2ö         | 00°24ø36.9ö         | 1208            | 22 | 102.4 (10038)                            | 24.18 (121)                              | 190.27 (952)                             | 21.41        | 15                   | 1.2                | 13.1 $\pm$ 1.6 (20)                                                | 22.3 $\pm$ 2.3                           |
| GPY12               | 42°57ø11.5ö         | 00°26ø24.1ö         | 677             | 13 | 104.4 (1044)                             | 16.74 (52)                               | 136.82 (425)                             | 14.92        | 89                   | 1.1                | --                                                                 | 22.0 $\pm$ 3.2                           |
| #JA2                | 42°47ø45.5ö         | 00°31ø26.8ö         | 1632            | 20 | 109.2 (7145)                             | 19.5 (91)                                | 135.8 (634)                              | 17.72        | 93                   | --                 | --                                                                 | 26.8 $\pm$ 3.1                           |
| #JA3                | 42°47ø59.7ö         | 00°31ø14.6ö         | 1641            | 16 | 112.7 (7373)                             | 41.8 (156)                               | 291 (1087)                               | 32.67        | 2                    | --                 | --                                                                 | 30.0 $\pm$ 3.5                           |

**Table 1**

| Sample                    | Latitude<br>(North) | Longitude<br>(East) | Altitude<br>(m) | Nb | <sup>238</sup> U<br>( $\mu$ mol) | <sup>232</sup> Th<br>( $\mu$ mol) | <sup>4</sup> He<br>( $\mu$ mol) | Ft    | Raw age<br>(Ma) $\pm 1\sigma$ | Corrected age<br>(Ma) $\pm 1\sigma$ | Mean age<br>(Ma) $\pm 1\sigma$    |
|---------------------------|---------------------|---------------------|-----------------|----|----------------------------------|-----------------------------------|---------------------------------|-------|-------------------------------|-------------------------------------|-----------------------------------|
| <i>Balaïtous</i>          |                     |                     |                 |    |                                  |                                   |                                 |       |                               |                                     |                                   |
| GPY15 1                   | 42°53'11.2"         | 00°16'1.00"         | 1417            | 1  | 0.42531                          | 0.53135                           | 0.00718                         | 0.727 | 10.21 $\pm$ 0.12              | 14.04 $\pm$ 0.16                    | 9.4 $\pm$ 4.2<br>(9.3 $\pm$ 5.6)  |
| GPY15 3                   |                     |                     |                 | 1  | 0.32811                          | 0.31242                           | 0.00312                         | 0.676 | 6.08 $\pm$ 0.06               | 8.99 $\pm$ 0.07                     |                                   |
| GPY15 4                   |                     |                     |                 | 1  | 0.13658                          | 0.20121                           | 0.00139                         | 0.765 | 5.92 $\pm$ 0.1                | 7.74 $\pm$ 0.11                     |                                   |
| GPY15 5                   |                     |                     |                 | 1  | 0.11808                          | 0.18527                           | 0.00290                         | 0.669 | 14.04 $\pm$ 0.32              | 20.98 $\pm$ 0.46                    |                                   |
| BA1 1-3-4                 | 42°50'20.0"         | 00°17'25.7"         | 3137            | 3  | 0.37182                          | 0.35352                           | 0.00533                         | 0.570 | 10.4 $\pm$ 0.11               | 18.23 $\pm$ 0.17                    | 15.0 $\pm$ 3.4                    |
| BA1 2-5                   |                     |                     |                 | 2  | 0.17384                          | 0.21111                           | 0.00225                         | 0.611 | 7.88 $\pm$ 0.11               | 12.9 $\pm$ 0.15                     |                                   |
| BA5 6-3                   | 42°51'29.1"         | 00°17'22.2"         | 2080            | 2  | 1.85155                          | 2.15826                           | 0.01671                         | 0.688 | 4.22 $\pm$ 0.05               | 6.13 $\pm$ 0.06                     | 6.3 $\pm$ 1.0                     |
| BA5 10-8                  |                     |                     |                 | 2  | 0.79015                          | 0.89596                           | 0.00540                         | 0.702 | 4.02 $\pm$ 0.04               | 5.73 $\pm$ 0.05                     |                                   |
| BA5 5-7                   |                     |                     |                 | 2  | 0.91906                          | 1.05174                           | 0.00665                         | 0.731 | 4.46 $\pm$ 0.04               | 6.1 $\pm$ 0.05                      |                                   |
| BA5 1-9                   |                     |                     |                 | 2  | 0.64933                          | 0.68147                           | 0.00416                         | 0.772 | 5.54 $\pm$ 0.14               | 7.18 $\pm$ 0.05                     |                                   |
| BA8 1-3-4                 | 42°45'15.3"         | 00°14'22.0"         | 1614            | 2  | 0.58653                          | 0.63138                           | 0.00337                         | 0.563 | 3.59 $\pm$ 0.04               | 6.37 $\pm$ 0.07                     | 6.27 $\pm$ 0.22                   |
| BA85-7-8                  |                     |                     |                 | 2  | 0.64510                          | 0.65350                           | 0.00405                         | 0.633 | 3.97 $\pm$ 0.04               | 6.26 $\pm$ 0.05                     |                                   |
| BA8 9                     |                     |                     |                 | 3  | 0.33613                          | 0.35925                           | 0.00216                         | 0.651 | 4.02 $\pm$ 0.05               | 6.17 $\pm$ 0.07                     |                                   |
| <i>Eaux-Chaudes</i>       |                     |                     |                 |    |                                  |                                   |                                 |       |                               |                                     |                                   |
| GPY09 1                   | 42°53'14.5"         | 00°25'28.0"         | 1066            | 1  | 0.35513                          | 0.22046                           | 0.00388                         | 0.630 | 7.44 $\pm$ 0.1                | 11.81 $\pm$ 0.15                    | 10.2 $\pm$ 6.1<br>(9.4 $\pm$ 5.0) |
| GPY09 2                   |                     |                     |                 | 1  | 0.25566                          | 0.34676                           | 0.00316                         | 0.685 | 7.33 $\pm$ 0.11               | 10.69 $\pm$ 0.15                    |                                   |
| GPY09 5-3                 |                     |                     |                 | 2  | 0.28581                          | 0.21926                           | 0.00468                         | 0.522 | 10.84 $\pm$ 0.14              | 20.75 $\pm$ 0.25                    |                                   |
| GPY09 6-4                 |                     |                     |                 | 2  | 0.40587                          | 0.25853                           | 0.00246                         | 0.514 | 4.12 $\pm$ 0.06               | 8.01 $\pm$ 0.09                     |                                   |
| GPY11 1                   | 42°54'34.2"         | 00°24'36.9"         | 1208            | 1  | 0.33130                          | 0.25048                           | 0.00287                         | 0.603 | 5.74 $\pm$ 0.08               | 9.52 $\pm$ 0.11                     | 10.4 $\pm$ 3.0                    |
| GPY11 2                   |                     |                     |                 | 1  | 0.18611                          | 0.19256                           | 0.00163                         | 0.522 | 5.51 $\pm$ 0.09               | 9.88 $\pm$ 0.13                     |                                   |
| GPY11 3                   |                     |                     |                 | 1  | 0.21665                          | 0.32194                           | 0.00290                         | 0.539 | 7.76 $\pm$ 0.11               | 14.39 $\pm$ 0.18                    |                                   |
| GPY11 4                   |                     |                     |                 | 1  | 0.23296                          | 0.21372                           | 0.00173                         | 0.472 | 4.78 $\pm$ 0.09               | 10.11 $\pm$ 0.16                    |                                   |
| GPY12 1                   | 42°57'11.5"         | 00°26'24.1"         | 677             | 1  | 0.41991                          | 1.12264                           | 0.00424                         | 0.735 | 4.86 $\pm$ 0.05               | 6.61 $\pm$ 0.06                     | 6.56 $\pm$ 0.78                   |
| GPY12 2                   |                     |                     |                 | 1  | 0.16894                          | 0.40008                           | 0.00140                         | 0.673 | 4.17 $\pm$ 0.07               | 6.19 $\pm$ 0.08                     |                                   |
| GPY12 3                   |                     |                     |                 | 1  | 0.16281                          | 0.39808                           | 0.00141                         | 0.675 | 4.43 $\pm$ 0.08               | 6.39 $\pm$ 0.09                     |                                   |
| GPY12 4                   |                     |                     |                 | 1  | 0.08278                          | 0.27371                           | 0.00079                         | 0.538 | 4.22 $\pm$ 0.12               | 7.84 $\pm$ 0.14                     |                                   |
| <i>Western Axial Zone</i> |                     |                     |                 |    |                                  |                                   |                                 |       |                               |                                     |                                   |
| GPY14 1-2-6               | 42°53'57.4"         | 00°42'57.7"         | 1594            | 3  | 1.22745                          | 1.79027                           | 0.03435                         | 0.691 | 15.87 $\pm$ 0.14              | 22.94 $\pm$ 0.19                    | 20.3 $\pm$ 4.3                    |
| GPY14 3-4-5               |                     |                     |                 | 3  | 1.63647                          | 3.63252                           | 0.04931                         | 0.882 | 15.51 $\pm$ 0.11              | 17.58 $\pm$ 0.12                    |                                   |
| GPY14 7-8                 |                     |                     |                 | 2  | 0.15968                          | 0.41246                           | 0.00557                         | 0.829 | 17.01 $\pm$ 0.19              | 20.5 $\pm$ 0.22                     |                                   |

TABLE 2

| Sample                    | Latitude (North) | Longitude (East) | Altitude (m) | <sup>238</sup> U (ppm) | <sup>232</sup> Th (ppm) | <sup>147</sup> Sm (ppm) | <sup>4</sup> He (nmol/g) | Ft   | Ue     | Raw age (Ma) ± 1σ | Corrected age (Ma) ± 1σ | Mean age (Ma) ± 1σ |
|---------------------------|------------------|------------------|--------------|------------------------|-------------------------|-------------------------|--------------------------|------|--------|-------------------|-------------------------|--------------------|
| <i>Balaitous</i>          |                  |                  |              |                        |                         |                         |                          |      |        |                   |                         |                    |
| GPY15 1                   | 42°53'11.2"      | 00°16'1.00"      | 1417         | 564.3                  | 230.2                   | 18.8                    | 45.9                     | 0.75 | 617.4  | 13.75 ± 0.69      | 18.4 ± 1.47             | 25.7 ± 6.5         |
| GPY15 2                   |                  |                  |              | 403.0                  | 47.5                    | 0.5                     | 44.4                     | 0.80 | 413.9  | 19.86 ± 0.99      | 25.0 ± 2.00             |                    |
| GPY15 3                   |                  |                  |              | 252.3                  | 51.1                    | 0.9                     | 40.9                     | 0.79 | 264.1  | 28.67 ± 1.43      | 36.2 ± 2.89             |                    |
| GPY15 4                   |                  |                  |              | 506.6                  | 88.0                    | 0.5                     | 52.8                     | 0.80 | 526.9  | 18.56 ± 0.93      | 23.2 ± 1.86             |                    |
| BA1 1                     | 42°50'20.0"      | 00°17'25.7"      | 3137         | 679.2                  | 106.7                   | 0.5                     | 71.5                     | 0.80 | 703.7  | 18.82 ± 0.94      | 23.6 ± 1.89             | 22.1 ± 1.2         |
| BA1 2                     |                  |                  |              | 590.8                  | 118.7                   | 0.8                     | 55.4                     | 0.80 | 618.1  | 16.59 ± 0.83      | 20.7 ± 1.66             |                    |
| BA1 3                     |                  |                  |              | 1040.4                 | 121.1                   | 0.5                     | 102.1                    | 0.81 | 1068.3 | 17.71 ± 0.89      | 21.8 ± 1.75             |                    |
| BA5 1                     | 42°51'29.1"      | 00°17'22.2"      | 2080         | 667.9                  | 143.8                   | 0.7                     | 73.2                     | 0.79 | 701.0  | 19.31 ± 0.97      | 24.6 ± 1.96             | 22.2 ± 1.7         |
| BA5 2                     |                  |                  |              | 318.1                  | 50.7                    | 0.3                     | 30.1                     | 0.79 | 329.8  | 16.92 ± 0.85      | 21.3 ± 1.70             |                    |
| BA5 3                     |                  |                  |              | 1125.8                 | 120.3                   | 0.5                     | 103.5                    | 0.80 | 1153.5 | 16.61 ± 0.83      | 20.8 ± 1.66             |                    |
| BA8 1                     | 42°45'15.3"      | 00°14'22.0"      | 1614         | 302.6                  | 67.3                    | 0.5                     | 30.1                     | 0.82 | 318.1  | 17.53 ± 0.87      | 21.4 ± 1.71             | 23.7 ± 2.3         |
| BA8 3                     |                  |                  |              | 163.4                  | 54.3                    | 0.5                     | 21.0                     | 0.85 | 176.0  | 22.03 ± 1.10      | 26.0 ± 2.08             |                    |
| <i>Eaux-Chaudes</i>       |                  |                  |              |                        |                         |                         |                          |      |        |                   |                         |                    |
| GPY09 1                   | 42°53'14.5"      | 00°25'28.0"      | 1066         | 768.6                  | 157.5                   | 1.4                     | 87.2                     | 0.82 | 804.9  | 20.04 ± 1.0       | 24.3 ± 1.9              | 25.8 ± 2.0         |
| GPY09 2                   |                  |                  |              | 821.6                  | 175.2                   | 1.0                     | 94.7                     | 0.83 | 862.0  | 20.32 ± 1.0       | 24.4 ± 1.9              |                    |
| GPY09 4                   | 42°54'34.2"      | 00°24'36.9"      | 1208         | 573.7                  | 157.0                   | 3.1                     | 77.6                     | 0.82 | 609.9  | 23.52 ± 1.2       | 28.6 ± 2.3              | 23.1 ± 1.8         |
| GPY11 1                   |                  |                  |              | 456.0                  | 106.3                   | 1.1                     | 46.7                     | 0.80 | 480.4  | 17.99 ± 0.9       | 22.6 ± 1.8              |                    |
| GPY11 2                   |                  |                  |              | 995.8                  | 258.7                   | 0.8                     | 96.1                     | 0.80 | 1055.4 | 16.86 ± 0.8       | 21.2 ± 1.7              |                    |
| GPY11 3                   |                  |                  |              | 428.8                  | 109.3                   | 0.7                     | 49.0                     | 0.79 | 454.0  | 19.96 ± 1.0       | 25.4 ± 2.0              |                    |
| GPY12 1                   | 42°57'11.5"      | 00°26'24.1"      | 677          | 334.3                  | 91.4                    | 1.0                     | 33.9                     | 0.83 | 355.4  | 17.67 ± 0.9       | 21.4 ± 1.7              | 21.9 ± 0.6         |
| GPY12 2                   |                  |                  |              | 615.0                  | 143.4                   | 1.9                     | 63.3                     | 0.84 | 648.0  | 10.08 ± 0.9       | 21.5 ± 1.7              |                    |
| GPY12 3                   |                  |                  |              | 343.3                  | 112.9                   | 0.6                     | 37.8                     | 0.83 | 369.3  | 18.95 ± 0.9       | 22.7 ± 1.8              |                    |
| JA3 1                     | 42°47'59.7"      | 00°31'14.6"      | 1641         | 551.2                  | 100.0                   | 1.4                     | 71.8                     | 0.79 | 574.2  | 23.16 ± 1.16      | 29.4 ± 2.3              | 196.5 ± 19.1       |
| JA3 2                     |                  |                  |              | 124.4                  | 31.2                    | 0.6                     | 14.8                     | 0.78 | 131.6  | 20.74 ± 1.04      | 26.6 ± 2.1              |                    |
| <i>Western Axial Zone</i> |                  |                  |              |                        |                         |                         |                          |      |        |                   |                         |                    |
| GPY01 1                   | 43°02'17.6"      | 00°44'51.9"      | 510          | 131.3                  | 99.9                    | 1.1                     | 17.8                     | 0.70 | 154.3  | 21.26 ± 1.16      | 30.4 ± 2.4              | 32.0 ± 1.2         |
| GPY01 2                   |                  |                  |              | 202.4                  | 102.2                   | 0.8                     | 29.7                     | 0.73 | 226.0  | 24.29 ± 1.04      | 33.2 ± 2.7              |                    |
| GPY01 3                   |                  |                  |              | 128.9                  | 63.0                    | 8.7                     | 18.3                     | 0.73 | 143.4  | 23.56 ± 2.15      | 32.3 ± 2.6              |                    |
| GPY03 1                   | 43°02'29.1"      | 00°53'50.4"      | 312          | 234.8                  | 71.7                    | 0.6                     | 27.1                     | 0.69 | 251.3  | 19.94 ± 1.00      | 28.8 ± 2.3              | 28.3 ± 0.8         |
| GPY03 2                   |                  |                  |              | 125.5                  | 98.9                    | 6.8                     | 15.5                     | 0.67 | 148.3  | 19.32 ± 0.97      | 28.9 ± 2.3              |                    |
| GPY03 3                   |                  |                  |              | 83.2                   | 89.7                    | 1.1                     | 10.5                     | 0.69 | 103.9  | 18.63 ± 0.93      | 27.1 ± 2.2              |                    |

Table 3

Table 3 continued

| Sample                     | Latitude (North) | Longitude (East) | Altitude (m) | <sup>238</sup> U (ppm) | <sup>232</sup> Th (ppm) | <sup>147</sup> Sm (ppm) | <sup>4</sup> He (nmol/g) | Ft   | Ue     | Raw age (Ma) ± 1σ | Corrected age (Ma) ± 1σ | Mean age (Ma) ± 1σ |
|----------------------------|------------------|------------------|--------------|------------------------|-------------------------|-------------------------|--------------------------|------|--------|-------------------|-------------------------|--------------------|
| <i>Western Axial Zone</i>  |                  |                  |              |                        |                         |                         |                          |      |        |                   |                         |                    |
| GPY04 1                    | 42°57'08.8"      | 00°49'57.1"      | 1800         | 66.3                   | 52.8                    | 0.3                     | 10.4                     | 0.81 | 78.5   | 24.48± 1.22       | 30.2 ± 2.4              | 32.6 ± 2.2         |
| GPY04 2                    |                  |                  |              | 30.3                   | 34.5                    | 0.4                     | 5.2                      | 0.78 | 38.2   | 25.04± 1.25       | 31.9 ± 2.6              |                    |
| GPY04 3                    |                  |                  |              | 145.4                  | 107.8                   | 0.5                     | 25.9                     | 0.79 | 170.2  | 28.10± 1.41       | 35.5 ± 2.8              |                    |
| GPY05 1                    | 42°51'05.4"      | 00°42'03.9"      | 1194         | 156.9                  | 44.2                    | 0.8                     | 38.9                     | 0.78 | 167.0  | 43.05± 2.15       | 55.0 ± 4.4              | 36.7 ± 13.2        |
| GPY05 2                    |                  |                  |              | 838.5                  | 583.5                   | 3.4                     | 96.7                     | 0.76 | 972.8  | 18.36± 0.92       | 24.3 ± 1.9              |                    |
| GPY05 3                    |                  |                  |              | 552.9                  | 185.4                   | 1.1                     | 72.7                     | 0.73 | 595.6  | 22.58± 1.13       | 30.9 ± 2.5              |                    |
| GPY06 2                    | 42°49'33.7"      | 00°42'40.2"      | 1097         | 32.6                   | 32.2                    | 0.5                     | 4.1                      | 0.78 | 40.0   | 35.24± 0.95       | 24.2 ± 1.9              | 25.5 ± 1.3         |
| GPY06 3                    |                  |                  |              | 58.8                   | 40.2                    | 0.6                     | 8.0                      | 0.81 | 68.1   | 18.94± 1.08       | 26.8 ± 2.1              |                    |
| GPY07 1                    | 42°56'55.8"      | 00°50'11.1"      | 1579         | 93.9                   | 28.6                    | 2.8                     | 15.4                     | 0.78 | 100.5  | 28.30± 1.41       | 36.3 ± 2.9              | 34.0 ± 2.3         |
| GPY07 2                    |                  |                  |              | 88.1                   | 13.0                    | 1.0                     | 11.9                     | 0.76 | 91.1   | 24.26± 1.21       | 31.8 ± 2.5              |                    |
| GPY08 1                    | 42°54'11.68"     | 00°48'53.61"     | 1810         | 56.9                   | 26.8                    | 0.5                     | 10.2                     | 0.80 | 63.0   | 29.97± 1.50       | 37.5 ± 3.0              | 61.6 ± 17.7        |
| GPY08 2                    |                  |                  |              | 110.3                  | 77.2                    | 0.6                     | 40.0                     | 0.72 | 128.1  | 57.48± 2.87       | 79.4 ± 6.3              |                    |
| GPY08 3                    |                  |                  |              | 45.5                   | 18.2                    | 1.0                     | 14.5                     | 0.79 | 49.7   | 53.82± 2.69       | 67.9 ± 5.4              |                    |
| GPY14 1                    | 42°53'57.4"      | 00°42'57.7"      | 1594         | 268.4                  | 274.5                   | 2.2                     | 73.5                     | 0.78 | 331.6  | 40.79± 2.03       | 52.4 ± 4.2              | 33.8 ± 14.2        |
| GPY14 2                    |                  |                  |              | 961.9                  | 384.9                   | 67.3                    | 62.0                     | 0.78 | 1050.8 | 10.92± 0.55       | 14.1 ± 1.1              |                    |
| GPY14 3                    |                  |                  |              | 925.9                  | 290.9                   | 5.4                     | 120.4                    | 0.80 | 992.9  | 22.44± 1.12       | 28.1 ± 2.2              |                    |
| GPY14 4                    |                  |                  |              | 441.1                  | 112.9                   | 1.5                     | 81.1                     | 0.79 | 467.1  | 32.11± 1.61       | 40.7 ± 3.2              |                    |
| <i>North Pyrenean Zone</i> |                  |                  |              |                        |                         |                         |                          |      |        |                   |                         |                    |
| CTH1 1                     | 43°06'15,9"      | 00°16'52,0"      | 439          | 344.9                  | 124.1                   | 1.3                     | 63.8                     | 0.77 | 373.5  | 31.55± 1.58       | 41.1 ± 3.3              | 43.9 ± 4.1         |
| CTH1 2                     |                  |                  |              | 362.9                  | 111.7                   | 0.6                     | 67.9                     | 0.79 | 388.6  | 32.29± 1.61       | 40.9 ± 3.3              |                    |
| CTH1 3                     |                  |                  |              | 22.6                   | 66.8                    | 0.5                     | 52.5                     | 0.82 | 237.0  | 40.93± 2.05       | 49.7 ± 4.0              |                    |
| ASS1 1                     | 43°09'10,5"      | 00°15'09,5"      | 317          | 44.6                   | 49.6                    | 1.0                     | 37.6                     | 0.78 | 56.1   | 122.51± 6.13      | 156.7 ± 12.5            | 219.7 ± 45.1       |
| ASS1 2                     |                  |                  |              | 148.3                  | 43.6                    | 1.3                     | 180.3                    | 0.80 | 158.4  | 206.51± 10.35     | 2596 ± 20.8             |                    |
| ASS1 3                     |                  |                  |              | 298.5                  | 192.7                   | 3.9                     | 343.4                    | 0.75 | 342.9  | 182.28± 9.11      | 242.9 ± 19.4            |                    |
| MCT7 1                     | 43°04'12,9"      | 00°19'22,7"      | 778          | 185.7                  | 78.7                    | 3.1                     | 34.5                     | 0.80 | 203.8  | 31.28± 1.56       | 39.1 ± 3.1              | 35.8 ± 2.4         |
| MCT7 2                     |                  |                  |              | 194.4                  | 150.3                   | 4.9                     | 32.5                     | 0.78 | 229.0  | 26.19± 1.31       | 33.4 ± 2.7              |                    |
| MCT7 3                     |                  |                  |              | 157.7                  | 21.5                    | 0.6                     | 24.0                     | 0.79 | 162.7  | 27.35± 1.37       | 34.8 ± 2.8              |                    |
| LBT2 1                     | 43°07'15,6"      | 00°14'05,7"      | 367          | 82.9                   | 46.2                    | 0.8                     | 15.0                     | 0.79 | 93.5   | 29.61± 1.48       | 37.6 ± 3.0              | 38.4 ± 3.3         |
| LBT2 2                     |                  |                  |              | 181.6                  | 54.8                    | 0.4                     | 36.6                     | 0.81 | 194.2  | 34.82± 1.74       | 42.8 ± 3.4              |                    |
| LBT2 3                     |                  |                  |              | 378.7                  | 98.7                    | 1.4                     | 58.3                     | 0.77 | 401.4  | 26.88± 1.34       | 34.8 ± 2.8              |                    |

Table 3 continued

| Sample                         | Latitude<br>(North) | Longitude<br>(East) | Altitude<br>(m) | <sup>238</sup> U<br>(ppm) | <sup>232</sup> Th<br>(ppm) | <sup>147</sup> Sm<br>(ppm) | <sup>4</sup> He<br>(nmol/g) | Ft   | Ue    | Raw age<br>(Ma) ± 1σ | Corrected age<br>(Ma) ± 1σ | Mean age<br>(Ma) ± 1σ |
|--------------------------------|---------------------|---------------------|-----------------|---------------------------|----------------------------|----------------------------|-----------------------------|------|-------|----------------------|----------------------------|-----------------------|
| <i>North Pyrenean<br/>Zone</i> |                     |                     |                 |                           |                            |                            |                             |      |       |                      |                            |                       |
| NAY3 1                         | 43°10'29,4"         | 00°17'20,1"         | 266             | 130.3                     | 10.6                       | 0.4                        | 87.0                        | 0.81 | 132.7 | 120.33± 6.02         | 148.9 ± 11.9               | 205.1 ± 49.2          |
| NAY3 2                         |                     |                     |                 | 141.6                     | 32.1                       | 0.9                        | 176.8                       | 0.80 | 149.0 | 215.49± 10.77        | 268.7 ± 21.5               |                       |
| NAY3 3                         |                     |                     |                 | 113.9                     | 29.2                       | 0.8                        | 103.6                       | 0.79 | 120.6 | 157.01± 7.85         | 197.9 ± 15.8               |                       |
| GPY17 1                        | 43°01'05.2"         | 00°24'47.5"         | 559             | 174.8                     | 79.4                       | 0.5                        | 22.5                        | 0.75 | 193.1 | 21.59± 1.08          | 28.8 ± 2.3                 | 27.8 ± 1.1            |
| GPY17 3                        |                     |                     |                 | 166.9                     | 57.3                       | 0.6                        | 19.7                        | 0.76 | 180.1 | 20.23± 1.01          | 26.7 ± 2.1                 |                       |
